# Supplementary material for: The Impact of Glucose on Corticospinal and Intracortical Excitability
Source: Brain Sci. 2019 Nov 25;9(12):339. doi: 10.3390/brainsci9120339 (PMC6955876; doi:10.3390/brainsci9120339)
Supplement: Supplementary file 1 [file brainsci-09-00339-s001.xlsx]

## Sheet: AURC
AURC
	Water			Sucrlose			Glucose
Participant #	T0	T1	T2	T0	T1	T2	T0	T1	T2
1	3.53268	7.31986	8.35939	2.43623	4.9737	4.13665	3.17061	4.25425	6.50691
2	3.18243	4.30896	4.87211	2.74879	5.1203	3.17277	2.80426	2.55239	4.47079
3	3.83766	6.20629	8.16654	5.05772	4.99988	5.80729	7.76706	12.0824	12.1851
4	3.14037	2.62996	4.09615	3.17263	3.65528	3.71767	2.45262	2.72813	3.17663
5	11.1239	11.9061	13.6316	6.0955	6.83445	7.15339	6.4112	8.23235	9.35726
6	3.49489	3.67291	3.26509	2.58649	2.16407	2.43909	1.91374	2.26636	2.71005
7	4.6867	6.39439	5.32333	3.74744	4.98582	3.72627	4.2021	3.55263	3.61844
8	4.11292	7.94547	8.12338	6.408	11.3358	8.91273	7.39227	5.95836	6.13581
9	3.7635	4.67757	6.32573	2.48904	3.10622	3.32516	2.97966	2.98876	2.663
10	10.9711	5.37897	8.07538	12.3632	12.1581	13.6388	15.8797	12.0338	10.9418
11	13.4237	13.3887	15.3626	20.8938	27.129	25.7125	16.0014	12.3558	14.2252
12	6.48925	6.4887	6.81394	7.33449	6.59054	6.46605	7.05288	8.55729	9.40703
13	6.57333	7.95455	7.33636	3.48333	4.21702	6.15918	3.23571	4.24186	7.87143
14	10.5405	10.6029	9.2746	9.33451	12.8025	11.47	7.45715	5.69112	5.39094
15	9.45983	13.6956	11.2954	11.0052	12.606	17.1558	7.92316	8.31442	10.2432
16	2.60996	2.80549	3.05769	6.12531	8.6586	7.70932	5.49326	3.43888	4.96037
17	6.0835	6.98689	6.26012	7.01958	8.55849	7.27605	3.75096	6.36387	4.9033
18	6.74684	9.74278	8.88816	3.50435	5.38931	4.98081	3.89313	4.06554	3.80632

## Sheet: SICI
SICI MEP SIZE
	Water						Sucralose						Glucose
	T0		T1		T2		T0		T1		T2		T0		T1		T2
Participant #	TS	CSTS	TS	CSTS	TS	CSTS	TS	CSTS	TS	CSTS	TS	CSTS	TS	CSTS	TS	CSTS	TS	CSTS
1	0.62	0.36	0.95	0.14			1.29	0.12	1.16	0.39	1.06	1.46	0.88	0.15	1.14	0.5	1.09	0.15
2	0.954564	0.495911	0.827179	0.515239	1.05868	0.864614	1.04663	0.523707	1.35426	0.785955	0.787786	0.978241	1.03935	0.577189	1.18179	0.490468	1.01972	0.535456
3	1.11102	0.370636	1.19647	0.0670116	1.28802	0.112686	1.21221	0.0741831	0.988439	0.0317638	1.10568	0.0654093	1.06356	0.122274	1.13391	0.326157	1.34501	0.315526
4	0.92	0.35	1.14	0.49	0.99	0.43	1.28	0.36	0.94	0.34	0.94	0.64	1.28	0.33	1.27	0.55	1.32	0.49
5	1.13	0.34	1.13	0.18	1.24	0.49	0.98	0.14	1.22	0.11	1.09	0.18	1.23	0.05	1	0.08	1.14	0.08
6	1.17872	0.745646	1.29125	0.479482	0.95492	0.300166	1.13223	0.525589	0.903293	0.515497	1.04156	0.656204	0.917562	0.515518	1.18347	0.597255	1.21429	0.648676
7	1.19	0.81	0.91	1.29	1.01	0.87	1.37	0.64	1.3	0.56	1.16	0.69	1.05	0.9	1.38	0.78	1.23	0.64
8	1.08	0.86	1.45	0.71	1.17	0.83	1.11	0.59	1.54	1.01	1.51	1.1	0.82	0.41	1.28	0.61	1.24	0.51
9	1.32	1.02	1.22	1.08	1.25	1.26	0.87	0.6	1.24	1.19	1.27	1.16	0.77	0.64	1.1	0.56	0.85	0.7
10	1.25	0.83	1.03	0.39	1.1	1.08	0.78	1.5	1.21	1.14	1.53	1.57	0.91	1.51	1.35	1.18	0.73	1.07
11	0.705592	2.73771	1.00474	1.1205	1.28156	2.4721	0.892563	3.73141	2.23162	6.65047	0.562261	4.15268	1.0597	1.16844	0.944748	1.73062	0.944748	1.63699
12	1.22	0.12	1.1	0.3	1.08	0.24	1.38	0.25	1.29	0.49	0.76	0.25	1.21	0.53	1.45	0.22	1.34	0.28
13	1.38664	0.342407	1.82309	0.443293	1.43865	0.200958	1.22625	0.465469	1.00054	0.296453	0.942917	0.497742	1.01555	0.634817	2.65175	0.755698	1.75273	0.346832
14	1.45	0.8	1.39	0.55	1.22	0.97			1.3	0.42	1.3	0.27	1.32	0.46	1.34	0.36	0.63	1.32
15	1.23	0.2	1.15	0.15	1.3	0.33	1.3	0.17	1.21	0.09	1.6	0.15	1.08	0.29	0.91	0.12	0.95	0.13
16	1.11	0.31	1.26	0.32	1.24	0.51	1.04	0.15	1.21	0.21	0.85	0.26	1.04	0.2	1.46	0.27	1.26	0.29
17	1.14	0.71	0.84	1.16	0.77	0.67	1.28	1.31	1.25	1.01	1.37	0.92	0.84	1.12	0.91	0.88	1.42	1
18	1.07	0.2	1.03	0.25	0.75	0.14	1.38	0.14	1.06	0.18	1.16	0.42	1.22	0.19	1.27	0.51	1.23	0.22
SICI RATIO
	Water			Sucralose			Glucose				*Outlier identified by SPSS
Participant #	T0	T1	T2	T0	T1	T2	T0	T1	T2		*Data lost due to collection error
1	0.585819	0.1515	.	0.0935068	0.333179	1.3772	0.171296	0.435267	0.141418		*Noise exceeds 0.100 mV
2	0.519515	0.622887	0.81669	0.500377	0.580358	1.24176	0.555335	0.41502	0.525102
3	0.3336	0.0560079	0.087488	0.0611966	0.0321354	0.0591577	0.114966	0.28764	0.23459
4	0.375564	0.43036	0.43196	0.279839	0.367744	0.686466	0.261725	0.43482	0.372595
5	0.302783	0.157419	0.398254	0.142233	0.0907553	0.160918	0.0420622	0.0782261	0.0741585
6	0.632592	0.371332	0.314336	0.464208	0.570687	0.630018	0.561835	0.504663	0.5342
7	0.682531	1.41417	0.857736	0.468937	0.430319	0.596248	0.857216	0.568374	0.516939
8	0.797237	0.486335	0.712543	0.530384	0.657151	0.731009	0.49961	0.477236	0.411262
9	0.767754	0.889512	1.0107	0.692218	0.965737	0.920399	0.834277	0.509957	0.821591
10	0.663918	0.379212	0.98043	1.92106	0.93882	1.02766	1.65987	0.875172	1.47443
11	3.88001	1.11522	1.92898	4.18056	2.9801	7.38568	1.10262	1.83183	1.73273
12	0.0974735	0.268271	0.224497	0.181646	0.377535	0.330859	0.441614	0.150522	0.209096
13	0.246932	0.243154	0.139685	0.379589	0.296292	0.527875	0.625097	0.284981	0.197882
14	0.550807	0.399989	0.79291	.	0.324626	0.20866	0.349448	0.269724	2.08669
15	0.158485	0.131209	0.255848	0.131019	0.0744127	0.0910148	0.26511	0.131131	0.132834
16	0.275631	0.254415	0.412542	0.139078	0.171258	0.308046	0.196086	0.184699	0.22855
17	0.621839	1.38924	0.877785	1.02323	0.807243	0.670945	1.32267	0.966837	0.702019
18	0.185202	0.246727	0.180274	0.103219	0.172702	0.363876	0.154725	0.405974	0.179174

## Sheet: SAI
SAI MEP SIZE
	Water						Sucralose						Glucose
	T0		T1		T2		T0		T1		T2		T0		T1		T2
Participant #	TS	CSTS	TS	CSTS	TS	CSTS	TS	CSTS	TS	CSTS	TS	CSTS	TS	CSTS	TS	CSTS	TS	CSTS
1	1.29242	0.559413	1.5507	0.15892			0.912069	0.566762	1.15934	0.445251	1.05324	0.197245	0.87527	0.498708	1.12747	0.0483449	1.05125	1.00352
2	1.21195	0.897802	0.891444	0.615412	1.73398	0.465342	0.874507	0.585734	1.23487	0.576019	1.29331	1.21615	0.760625	0.451711	1.44239	0.496979	1.02178	0.92219
3	1.36976	1.03928	0.664201	0.291367	0.784378	0.678101	0.929538	0.608648	1.10125	0.698369	1.40762	0.992584	1.33059	0.872472	1.24987	0.828857	1.18266	0.67215
4	0.606155	0.454025	0.801468	0.855738	1.22383	1.28136	0.956599	0.859883	1.3665	1.26879	1.2604	1.03991	0.988134	0.870361	1.08172	0.798874	0.909119	0.671412
5	0.999807	1.02933	1.14075	0.338135	1.2927	0.250473	0.9095	0.321859	1.07023	0.708873	1.07361	0.576909	0.951767	0.546468	1.06346	0.42717	1.05756	0.298411
6	0.950521	0.90744	1.0906	1.01573	0.900141	1.07417	1.02178	0.849177	0.90922	0.84226	1.34974	0.809936	0.797831	0.930837	0.923716	1.0655	0.894445	1.26343
7	1.0097	0.514374	0.822805	0.525513	0.898972	0.672836	0.854467	0.458603	0.769984	0.503311	0.705414	0.544561	0.930456	0.610402	0.781123	0.689418	0.666733	0.723673
8	1.27551	0.917714	1.23339	0.867132	1.1673	0.792821	1.07473	0.907949	1.44948	0.637055	0.851237	1.07073	0.910873	0.660248	1.2425	1.16689	1.13602	0.74791
9	0.842768	0.474472	1.13981	0.970357	0.731913	0.263977	1.12094	0.940781	0.795466	0.534439	0.865504	0.422974	0.899175	1.06873	0.900853	0.698725	0.918274	0.553309
10	0.924759	0.39388	0.972799	0.221227	1.23248	0.680669	1.04042	0.840963	1.12035	0.518138	1.66306	0.679397	1.32205	1.11224	1.20567	0.379512	1.87899	0.454763
11	1.30514	0.450058	1.15957	0.758184	1.1072	1.28372	2.02972	0.294011	2.14778	2.52317	1.15245	0.667369	0.973206	0.505956	1.03399	0.691833	1.14634	0.398916
12	1.31027	0.670675	1.14258	0.995305	1.14385	0.664037	1.60886	0.552623	1.0674	0.147527	1.25364	0.456746	1.28581	0.339788	1.03355	0.294342	1.06771	0.689824
13	1.43087	0.755513	1.48946	1.38646	1.07193	0.725428	1.14286	0.644201	1.32431	0.390396	1.40811	1.98792	0.934118	0.837377	0.926793	1.8766	1.0557	0.879949
14	0.912399	0.844066	1.25104	0.51061	0.803986	0.2388	1.09891	0.525513	1.35038	0.773748	0.973053	0.682348	0.994059	0.612462	0.843534	0.633316	1.03823	0.33488
15	1.35709	0.254059	0.770671	0.362345	1.14342	1.4344	1.0198	1.01885	1.33237	0.324961	1.06839	0.427322	0.987167	0.265376	0.870387	0.532455	0.867894	0.19666
16	1.02511	0.834376	0.984726	0.718536	0.959931	1.02941	0.79389	0.922902	1.01519	0.806427	1.06138	1.69233	1.22772	0.857264	1.14591	1.01418	1.09853	1.43771
17	0.741653	0.508728	0.814387	0.970306	0.848719	0.690867	1.12274	0.652084	1.12264	0.76121	1.33514	0.785853	1.0881	0.573374	0.928192	0.966898	0.808487	0.557759
18	1.52161	0.519028	1.40709	1.23535	0.91039	0.19811	1.08261	0.653839	1.25254	0.685984	1.3972	0.541407	0.992508	0.558904	1.16824	0.556539	1.3279	0.647532
SAI RATIO
	Water			Sucralose			Glucose				*Outlier identified by SPSS
Participant #	T0	T1	T2	T0	T1	T2	T0	T1	T2		*Data lost due to collection error
1	0.432841	0.102483		0.621403	0.384057	0.187275	0.569777	0.042879	0.954593		*Noise exceeds 0.100 mV
2	0.740788	0.690355	0.268366	0.669788	0.466462	0.94034	0.593868	0.344553	0.902534
3	0.758731	0.438672	0.864507	0.654785	0.634159	0.705149	0.655702	0.663153	0.568338
4	0.749025	1.06771	1.047	0.898897	0.928498	0.825064	0.880813	0.738521	0.738531
5	1.02953	0.296415	0.19376	0.353885	0.662358	0.537356	0.574162	0.401679	0.282169
6	0.954677	0.93135	1.19333	0.831077	0.926354	0.600068	1.16671	1.15349	1.41253
7	0.509432	0.638685	0.748451	0.536712	0.653665	0.771974	0.656025	0.882598	1.0854
8	0.71949	0.703045	0.679194	0.844818	0.439505	1.25786	0.724851	0.939149	0.658361
9	0.562992	0.851336	0.360667	0.839281	0.671856	0.488702	1.18856	0.775626	0.602553
10	0.425928	0.227413	0.552277	0.808291	0.462478	0.408524	0.8413	0.314772	0.242025
11	0.344836	0.653851	1.15943	0.144853	1.17478	0.579089	0.519886	0.669094	0.34799
12	0.511859	0.871105	0.580528	0.343487	0.138211	0.364337	0.26426	0.284786	0.64608
13	0.528011	0.93085	0.67675	0.563675	0.294792	1.41176	0.896436	2.02483	0.833518
14	0.925105	0.408147	0.29702	0.478211	0.572986	0.701244	0.616123	0.750789	0.322548
15	0.187208	0.470169	1.25449	0.999077	0.243897	0.399967	0.268825	0.611746	0.226595
16	0.813937	0.729682	1.07238	1.16251	0.794359	1.59447	0.698256	0.88504	1.30876
17	0.685938	1.19146	0.814011	0.580796	0.678054	0.58859	0.526948	1.0417	0.68988
18	0.341105	0.877948	0.21761	0.603946	0.547673	0.387496	0.563123	0.476392	0.487638

## Sheet: LAI
LAI MEP SIZE
	Water						Sucralose						Glucose
	T0		T1		T2		T0		T1		T2		T0		T1		T2
Participant #	TS	CSTS	TS	CSTS	TS	CSTS	TS	CSTS	TS	CSTS	TS	CSTS	TS	CSTS	TS	CSTS	TS	CSTS
1	1.29242	0.503413	1.5507	1.83385			0.912069	0.962397	1.15934	0.68217	1.05324	0.516586	0.87527	0.270665	1.12747	0.167185	1.05125	0.572688
2	1.21195	1.08828	0.891444	0.920817	1.73398	1.78088	0.874507	0.909169	1.23487	0.779749	1.29331	1.71422	0.760625	0.650151	1.44239	0.734482	1.02178	0.589218
3	1.36976	2.47978	0.664201	1.55825	0.784378	0.633316	0.929538	0.632299	1.10125	1.11501	1.40762	1.19944	1.33059	0.981852	1.24987	0.693029	1.18266	1.33301
4	0.606155	0.728124	0.801468	1.19568	1.22383	1.53201	1.08302	1.38081	1.3665	1.36869	1.2604	1.01557	0.988134	0.68161	1.08172	1.45302	0.909119	1.36982
5	0.999807	0.698013	1.14075	0.494944	1.2927	0.870158	0.9095	0.678075	1.07023	1.5696	1.07361	1.27904	0.872167	0.770416	1.06346	1.97273	1.05756	1.325
6	0.950521	0.226873	1.0906	0.33783	0.900141	0.32402	1.02178	0.461197	0.90922	0.519206	1.34974	0.38264	0.797831	0.771841	0.923716	0.554352	0.894445	0.727539
7	1.0097	0.498682	0.822805	0.470327	0.898972	0.622406	0.854467	0.586802	0.769984	0.593643	0.705414	0.721614	0.930456	0.750961	0.781123	0.928904	0.666733	0.574849
8	0.952301	0.598907	1.23339	1.41075	1.1673	0.848872	1.07473	0.597255	1.44948	0.139847	0.851237	1.35279	0.910873	1.21318	1.2425	1.68208	1.13602	1.55764
9	0.842768	0.258204	1.13981	0.593364	0.731913	0.186539	1.12094	1.04424	0.795466	0.574239	0.865504	0.399043	0.899175	0.739136	0.900853	0.507965	0.918274	0.851644
10	0.924759	0.0236765	0.972799	0.0400797	1.23248	0.237274	1.04042	0.0525157	1.12035	0.114492	1.66306	0.0350953	1.32205	0.0252788	1.20567	0.0267284	1.87899	0.0538127
11	1.66219	1.01542	1.15957	0.701726	1.1072	0.332209	2.02972	0.684636	2.14778	2.40061	1.15245	0.184301	0.973206	0.932643	1.03399	1.13678	1.14634	1.15918
12	1.31027	0.42216	1.14258	0.494487	1.14385	0.322444	1.60886	0.410105	1.0674	0.312475	1.25364	0.732371	1.28581	0.379588	1.03355	0.243657	1.06771	0.196635
13	1.43087	0.682271	1.48946	1.25308	1.07193	0.813141	1.14286	0.952352	1.32431	0.395686	1.40811	0.955912	0.934118	0.487162	0.926793	1.12287	1.0557	0.70727
14	0.912399	0.26858	1.25104	0.318781	0.803986	0.234095	1.09891	0.285848	1.35038	1.32055	0.973053	0.28834	0.994059	0.785522	0.843534	0.545909	1.03823	0.4216
15	1.35709	0.224152	0.770671	0.188243	1.14342	0.316366	1.0198	0.513586	1.33237	0.231705	1.06839	0.345586	0.987167	0.597712	0.870387	0.724691	0.867894	0.42745
16	1.02511	0.671692	0.984726	0.617345	0.959931	0.605545	0.79389	0.233358	1.01519	0.154978	1.06138	0.358429	1.22772	0.149943	1.14591	0.704727	1.09853	0.775096
17	0.741653	0.600942	0.814387	0.901006	0.848719	0.520528	1.12274	0.770315	1.12264	1.0773	1.33514	0.948105	1.0881	0.494054	0.928192	0.825805	0.808487	0.764567
18	1.52161	0.435511	1.40709	1.1543	0.91039	0.250855	1.08261	0.538966	1.25254	0.587336	1.3972	0.674083	0.992508	0.890528	1.16824	0.674261	1.3279	0.870387
LAI RATIO
	Water			Sucralose			Glucose				*Outlier identified by SPSS
Participant #	T0	T1	T2	T0	T1	T2	T0	T1	T2		*Data lost due to collection error
1	0.389512	1.1826		1.05518	0.588413	0.490475	0.309237	0.148283	0.544766		*Noise exceeds 0.100 mV
2	0.897956	1.03295	1.02704	1.03964	0.631443	1.32545	0.854759	0.509212	0.576659
3	1.81038	2.34606	0.807412	0.68023	1.01249	0.852105	0.737906	0.554479	1.12713
4	1.20122	1.49186	1.25181	1.27496	1.0016	0.805755	0.689795	1.34325	1.50676
5	0.698148	0.433877	0.673132	0.745547	1.4666	1.19135	0.883336	1.85501	1.25288
6	0.238683	0.309766	0.359966	0.451367	0.571045	0.283491	0.967423	0.600132	0.813397
7	0.493892	0.571614	0.692353	0.686747	0.770982	1.02296	0.80709	1.18919	0.862189
8	0.628906	1.1438	0.727211	0.555727	0.0964804	1.58921	1.33188	1.35379	1.37114
9	0.306376	0.520583	0.254865	0.931574	0.72189	0.461053	0.822015	0.563871	0.92744
10	0.0256029	0.0412004	0.192518	0.0504754	0.102193	0.0211029	0.019121	0.0221689	0.0286391
11	0.610893	0.605163	0.300044	0.337305	1.11772	0.159921	0.95832	1.09941	1.0112
12	0.322193	0.432781	0.281893	0.254904	0.292743	0.584197	0.295214	0.235747	0.184165
13	0.476824	0.841296	0.758577	0.833307	0.298786	0.678864	0.521521	1.21156	0.669951
14	0.294367	0.254813	0.291169	0.260119	0.977909	0.296325	0.790217	0.647169	0.406075
15	0.165171	0.244258	0.276684	0.503616	0.173904	0.323463	0.605482	0.832608	0.492513
16	0.655238	0.626921	0.630822	0.293942	0.152659	0.337702	0.122131	0.614994	0.705574
17	0.810273	1.10636	0.61331	0.686101	0.959609	0.710114	0.45405	0.889692	0.945676
18	0.286218	0.820347	0.275546	0.497839	0.468915	0.482454	0.897251	0.57716	0.655463

## Sheet: Glucose
CAPILLARY GLUCOSE
	Water				Sucralose				Glucose
Participant #	T0	T1	T2	T3	T0	T1	T2	T3	T0	T1	T2	T3		*Outlier identified by SPSS
1	4.6	4.35	4.25		4.6	4.85	4.6	4.4	5	5.95	6.6	5.4		*Data lost due to collection error
2	4.4	4.2	4.15	4.35	4.4	4.7	4.25	4.4	4.05	12.15	6.8	4.1		*Noise exceeds 0.100 mV
3	4.8	4.35	4.6	4.25	4.4	5.15	4.2	4.65	4.6	8.05	7.9	6.75
4	4.9	4.3	4.55	4.15	4.95	5.05	4.75	4.85	4.05	5.9	8.05	7.55
5	3.85	3.9	3.95	3.75	4.35	4.8	4.2	4.5	4.45	6.2	7.1	6.2
6	4.2	3.9	4.15	4.4	4.2	4.9	4.1	4.25	4.15	7.75	6.3	5.4
7	4.9	4.7	4.25	4.45	5.25	6.1	5.05	4.8	4.25	6.8	8.3	6.85
8	5.5	4.45	4.9	5.1	4.55	5.3	4.5	4.7	4.95	6.5	7.45	6.6
9	5.15	4.9	4.9	4.8	4.65	5.35	5.3	4.95	4.75	7.85	9.3	6.7
10	4.7	4.5	4.9	4.85	5.4	6.15	4.95	4.7	5.25	9.5	7.7	7.75
11	5.15	4.35	4.7	4.55	5.35	5.4	5.15	4.6	4.95	7.85	9.45	9.1
12	5	4.7	5	5	4.95	5.2	5.3	4.9	4.45	6.4	7.3	6.35
13	4.65	4.65	4.8	4.75	4.9	5.85	4.95	5.65	5.25	7.85	6.05	6.8
14	4.15	4.95	5.6	5.45	5.05	6.3	4.9	4.9	5.4	9.6	8.8	7.95
15	4.6	4.15	4.2	4.55	3.95	4.5	4.35	3.95	4.35	10.8	11.05	9.15
16	5.3	5.3	5.1	4.9	5.7	6.05	5.4	5.65	4.8	10.65	8.65	6.2
17	4.9	4.7	4.35	4.3	4.3	4.8	4.5	4.2	4.85	7.55	6.25	6.1
18	5.45	4.7	4.75	5.15	4.85	5.25	5.05	5	5.2	8.25	7.2	5.95

## Sheet: Mean Arterial Pressure 
MEAN ARTERIAL PRESSURE
	Water				Sucralose				Glucose
Participant #	T0	T1	T2	T3	T0	T1	T2	T3	T0	T1	T2	T3		*Outlier identified by SPSS
1	86.1667	91.6667	90.5		82.3333	87.8333	85.1667	87.5	82.3333	82.5	81.1667	85.1667		*Data lost due to collection error
2	90.6667	87.6667	85.3333	93.6667	84.8333	88.6667	89.6667	88.6667	83.1667	85.1667	87.3333	87		*Noise exceeds 0.100 mV
3	78.8333	82.6667	87.3333	91.3333	79.1667	82.5	83.8333	84.6667	78.1667	79.5	78	72.5
4	87	91.8333	81.8333	87.6667	89	89.5	88.1667	85.6667	88	92	86.6667	87
5	81	84.3333	84.3333	92.3333	78.1667	81.3333	86.5	78.8333	77.6667	84.8333	85.8333	85.3333
6	89.5	95.1667	101.5	97.8333	85.6667	90	91.5	92.6667	99.3333	101.167	83.5	98.1667
7	86.6667	88.8333	92.8333	93	91.6667	92.8333	92.1667	95.6667	90.3333	95.5	88	97.8333
8	66.5	74.6667	75.8333	73.3333	82	83.1667	80.8333	81.3333	74.6667	77.6667	78.3333	75.8333
9	87.3333	93.5	95.5	97.8333	93.1667	91.1667	92.3333	94.6667	85	91	88.1667	95
10	71.8333	82.3333	74	81.6667	77.8333	74.5	84.5	84.5	78.6667	80.3333	80.3333	83.8333
11	77.1667	79.5	74.6667	83.8333	65.8333	75.1667	77.1667	78.5	70.3333	79.5	82.1667	86.5
12	82.5	81.3333	82	79.8333	75.6667	83.6667	76	81.1667	78.1667	81.6667	81	84.8333
13	72	81.3333	76.6667	81	71.6667	78.5	78.5	80.6667	71.1667	75.5	73.5	74
14	93.5	101.667	96.3333	100.5	89.5	94.5	95.5	98	92.8333	101.5	102.333	95.6667
15	89.6667	90.3333	90.3333	96.6667	80.1667	91.1667	88.6667	93	79.3333	85.1667	84.1667	88.1667
16	92.8333	91.5	92.8333	95.5	91.1667	93.8333	91.5	95.5	91.5	94	89.3333	90.3333
17	75.6667	78	83.5	82.3333	83.6667	80.5	84	84.6667	78.1667	78.3333	78.5	79
18	85.8333	89.1667	87.8333	87.6667	84.8333	87.5	88.6667	85.6667	86.3333	91	95.3333	95.1667
